anorganischen, im Winter dagegen ist mehr organisch gebundener Phosphor als Phosphat vorhanden. Die Verfasser vermuten, dass die Schicht dicht über dem Boden sehr viel organischen Phosphor enthält, der aus den abgestorbenen und abgesunkenen Organismen freigeworden ist. Diese Schicht, die mit den bisherigen Schöpfmethoden nicht erfasst wurde, soll noch näher untersucht werden, ebenso bedarf das Bestimmungsverfahren für den organischen Phosphor noch weiterer Ausarbeitung. Aber schon diese vorläufige Mitteilung gibt einen interessanten Einblick in den komplizierten Vorgang der Regeneration der anorganischen Nährstoffe des Planktons.

H. W.

**L. H. N. Cooper.** "Chemical Constituents of Biological Importance in the English Channel. Pt. III. June—December, 1932. Phosphate, Silicate, Nitrite, Hydrogen-Ion Concentration, with a Comparison with Wind Records". Journ. Mar. Biol. Assoc. N. S., Vol. XIX, No. 1. Plymouth, 1933.

Die Untersuchungen bilden die Fortsetzung der kürzlich referierten Arbeiten<sup>1)</sup>, die sich von Nov. 1930 bis Jan. 1932 erstreckten. Während des August 1932 trat eine merkwürdige doppelte Schichtung der Wassermassen auf. Starke Winde Ende Juli hatten das Wasser bis 10 m. Tiefe gemischt, und das folgende sonnige Wetter hatte eine zweite Sprungschicht dicht unter der Oberfläche erzeugt. Die zwischen den Sprungflächen eingeschlossene Schicht zeichnete sich durch abnorme chemische Verhältnisse aus.

Auch sonst fand der Verfasser, dass die Windverhältnisse eine grosse Bedeutung für die chemischen und biologischen Eigenschaften des Wassers besitzen. So fand er, dass in drei von vier Fällen eine Planktonentwicklung mitten im Winter mit vorhergehendem ungewöhnlich ruhigen und sonnigen Wetter zusammenhing. Als ein Mass für die mischende Wirkung des Windes wird die dem tatsächlichen Winddruck proportionale dritte Potenz der Beaufort-Stärke benutzt. Darnach hat z. B. ein Wind von Stärke 6 eine acht mal so grosse Wirkung wie ein Wind von Stärke 3. Schliesslich wird der offenkundig vorhandene Einfluss von stürmischem Wetter auf die Bodenfauna und auf die Erträge der Fischerei diskutiert.

H. W.

**R. S. Wimpenny.** "Variations in North Sea Plankton, 1923—24". Min. of Agric. and Fish., Fish. Invest., Ser. II, Vol. 13, No. 3, 1933. London 1933.

Die Untersuchungen bezogen sich auf die "Flamborough-Linie" zwischen Flamborough Head und der Doggerbank (4 Fahrten) und auf eine nördlichere Linie zwischen der Tynemündung und dem Südende Norwegens (3 Fahrten). Aus Vertikalzügen mit Hensen- und Apsteinnetzen wurden Werte für je 1 m.<sup>3</sup> berechnet.

Das Phytoplankton zeigte auf der Flamborough-Linie das Maximum im März, das Minimum im Oktober. Über der Küstenbank und besonders der Doggerbank erwies es sich als reicher als in den tieferen Zwischengebieten. Die Diatomeen sind meist bedeutend zahlreicher als die Peridineen, letztere nehmen nach Osten zu. Die Untersuchung der einzelnen Arten ergab Wucherungen der Diatomeen vorwiegend im (Februar und) März, der Peridineen (*Ceratium*) von August bis Oktober. Das Zooplankton hat ein bedeutendes Maximum im August, was vielleicht von Einfluss auf die

<sup>1)</sup> Journal du Conseil, VIII, 3, S. 392.
